# Supplementary material for: Is there an optimal inter-delivery interval in women who underwent trial of labor after cesarean delivery (TOLAC)?
Source: PubMed Central journal article supplement (PMC8772215; doi:10.1186/s12978-021-01319-0), 2022-01-20
Supplement: 12978_2021_1319_MOESM1_ESM.pdf [file 12978_2021_1319_MOESM1_ESM.pdf]

Table S1 Descriptive and obstetric characteristics of women who attempted TOLAC

| Variable                                                     | Successful TOLAC<br>(n=868) | Failed TOLAC<br>(n=212) | P-value |
|--------------------------------------------------------------|-----------------------------|-------------------------|---------|
| Maternal age (y, s.d.)                                       | 31.9±6.7                    | 33.4±9.2                | 0.011   |
| Maternal Nationality (%)                                     |                             |                         | 0.297   |
| Han                                                          | 845(97.4)                   | 209(98.6)               |         |
| Other minorities                                             | 23(2.6)                     | 3(1.4)                  |         |
| Parity                                                       | 1.3±0.6                     | 1.2±0.4                 | <0.001  |
| Number of CS                                                 |                             |                         | 0.322   |
| 1                                                            | 864(99.5)                   | 212(100.0)              |         |
| 2                                                            | 4(0.5)                      | 0                       |         |
| Any prior vaginal delivery                                   | 210(24.2)                   | 29(13.7)                | 0.017   |
| BMI at first prenatal visit (kg/m <sup>2</sup> )             | 21.5±3.0                    | 21.9±3.0                | 0.103   |
| BMI at delivery (kg/m <sup>2</sup> )                         | 26.1±3.0                    | 26.8±3.3                | 0.005   |
| Time interval between last cesarean section (months)         |                             |                         | 0.550   |
| 0 – 23 months                                                | 25(2.9)                     | 3(1.4)                  |         |
| 24 – 59 months                                               | 322(38.0)                   | 73(34.9)                |         |
| 60 – 119 months                                              | 411(48.5)                   | 110(52.6)               |         |
| 120 - months                                                 | 89(10.5)                    | 23(11.0)                |         |
| Estimated fetal weight at TOLAC delivery (g)                 | 2995±480                    | 3145±375                | <0.001  |
| Lower uterine segment thickness (mm)                         | 2.64±0.67                   | 2.68±0.67               | 0.672   |
| Cervical dilatation on admission At TOLAC delivery (5~6cm)   | 139(21.0)                   | 19(12.4)                | 0.001   |
| Cervical effacement on admission At TOLAC delivery (80~100%) | 543(81.5)                   | 106(69.3)               | 0.001   |
| Cervical score                                               | 8.1±2.8                     | 7.5±2.5                 | 0.016   |
| Pre-existing medical condition                               |                             |                         |         |
| GDM                                                          | 166(19.1)                   | 46(21.7)                | 0.398   |
| Preeclampsia                                                 | 24(2.8)                     | 6(2.8)                  | 0.959   |

1 GDM, gestational diabetes mellitus.

2 Data are expressed as mean  $\pm$  standard deviation or n (%).
